# Supplementary material for: Detection of unrecorded environmental challenges in high-frequency recorded traits, and genetic determinism of resilience to challenge, with an application on feed intake in lambs
Source: PubMed Central journal article supplement (PMC7788967; doi:10.1186/s12711-020-00595-x), 2021-01-06
Supplement: 12711_2020_595_MOESM2_ESM.pdf [file 12711_2020_595_MOESM2_ESM.pdf]

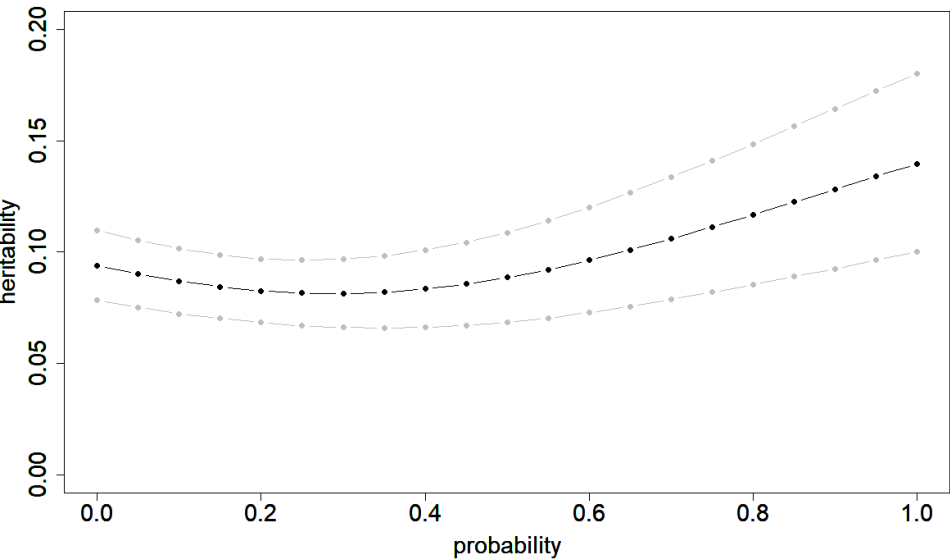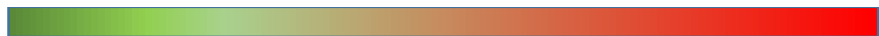

$(p \approx 0)$

$(p \approx 1)$

Non – challenging  
environmental conditions

Challenging environmental  
conditions
